# Supplementary material
Source: ML conference proceedings conference paper supplement (https://openaccess.thecvf.com/content/CVPR2026/html/Geng_CrossHOI_Learning_Cross-View_CVPR_2026_paper.html)
Supplement: Supplementary file 1 [file Geng_CrossHOI_Learning_Cross-View_CVPR_2026_supplemental.pdf]

# CrossHOI: Learning Cross-View Representations for Monocular 3D Human-Object Interaction Reconstruction

## Supplementary Material

### 1. Efficiency

Our method improves substantially over the CONTHO baseline with minor overhead, and is significantly more efficient than HOI-TG (27% fewer parameters and higher FPS) while achieving better overall performance, indicating a favorable efficiency-accuracy trade-off.

| Method      | Params(M)↓ | Infer. Speed(FPS)↑ | Acc.(Contact <sub>p</sub> ) ↑ |
|-------------|------------|--------------------|-------------------------------|
| CONTHO [28] | 83         | 1.68               | 0.628                         |
| HOI-TG [36] | 123        | 1.33               | 0.662                         |
| Ours        | 90         | 1.60               | 0.687                         |

Table S1. Efficiency-accuracy comparison with SOTA methods.

### 2. Cross-Dataset Generalization of the Generator.

To evaluate cross-dataset generalization, we restrict the experiments to overlapping object categories between BEHAVE and InterCap (e.g., Chair, Table, Box). We conduct cross-dataset evaluation by training the cross-view generator on InterCap and testing on BEHAVE. Two variants are compared: Ours-B2B (BEHAVE→BEHAVE) and Ours-I2B (InterCap→BEHAVE). Although a slight performance drop is observed due to domain gap, the cross-view generator remains effective and consistently outperforms the baseline (Tab. R2), demonstrating transferable representations rather than dataset-specific priors.

| Method      | CD <sub>human</sub> ↓ | CD <sub>object</sub> ↓ | Contact <sub>p</sub> ↑ | Contact <sub>r</sub> ↑ |
|-------------|-----------------------|------------------------|------------------------|------------------------|
| CONTHO [28] | 5.18                  | 8.87                   | 0.615                  | 0.481                  |
| Ours-B2B    | 4.36(15.8%)           | 7.78                   | 0.684(6.9pp)           | 0.572                  |
| Ours-I2B    | 4.42(14.7%)           | 7.83                   | 0.679(6.4pp)           | 0.568                  |

Table S2. Cross-dataset evaluation of the generator.

### 3. Additional Qualitative Results

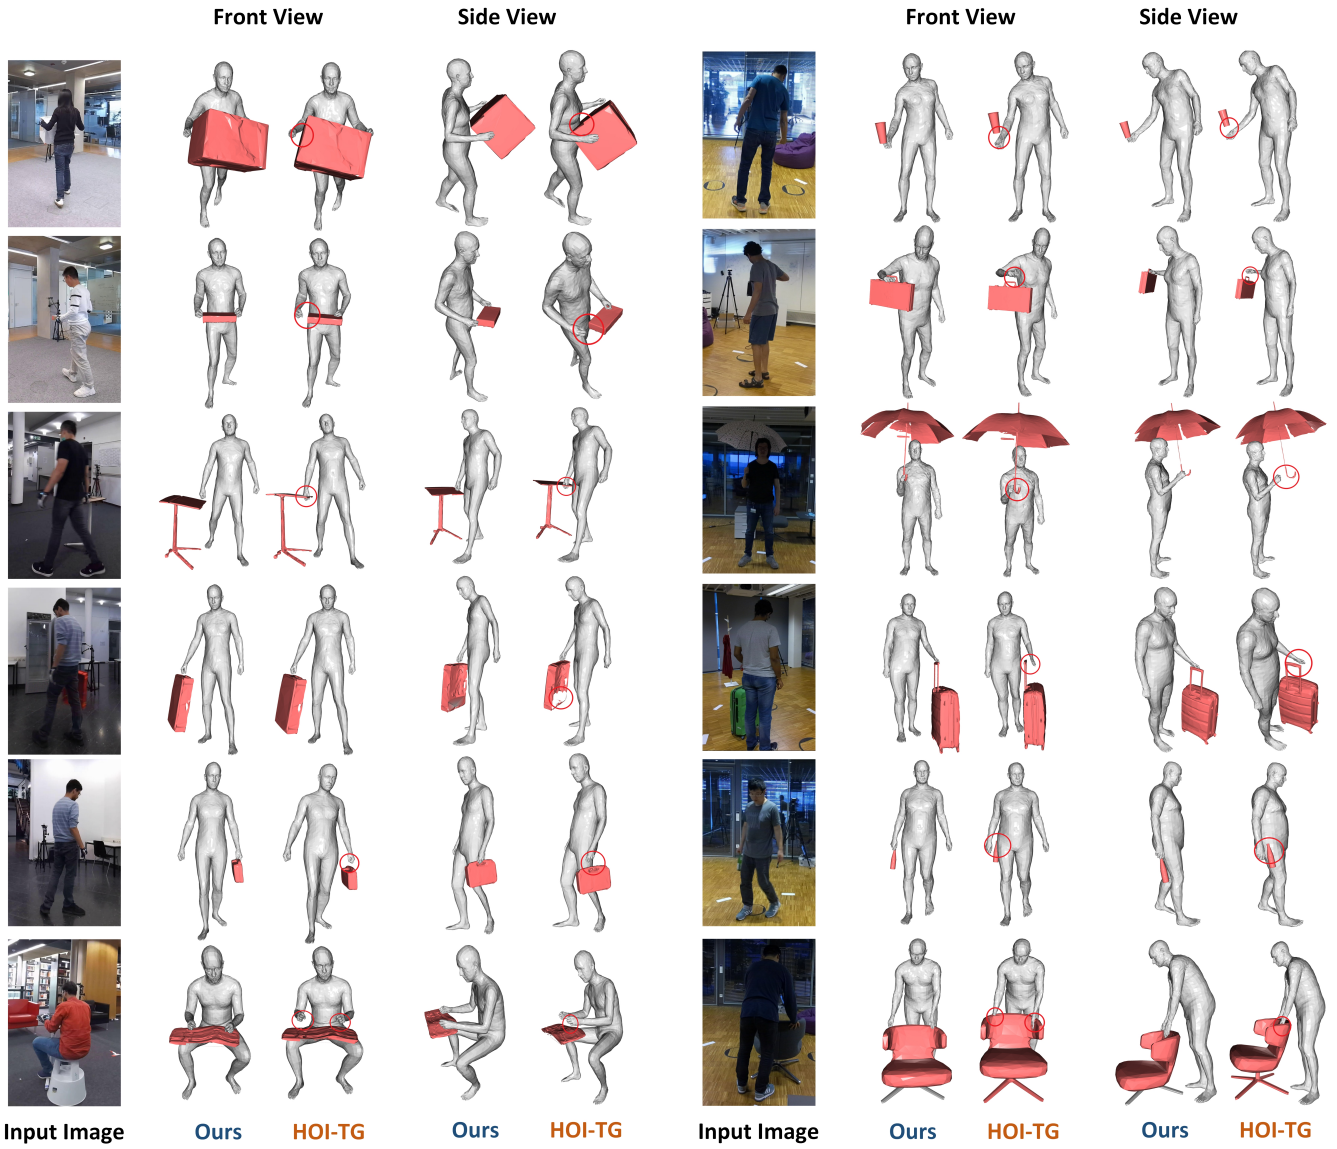

Figure 1. Qualitative comparison of 3D human-object reconstruction with HOI-TG [36] on the BEHAVE dataset (left) and the InterCap dataset (right). The incorrectly predicted contact regions are highlighted with red circles.
